# Supplementary material for: Breathing is coupled with voluntary action and the cortical readiness potential
Source: PubMed Central journal article supplement (PMC7005287; doi:10.1038/s41467-019-13967-9), 2020-02-06
Supplement: 41467_2019_13967_MOESM1_ESM.pdf [file 41467_2019_13967_MOESM1_ESM.pdf]

# **Breathing is coupled with voluntary action and the cortical readiness potential**

Park et al.

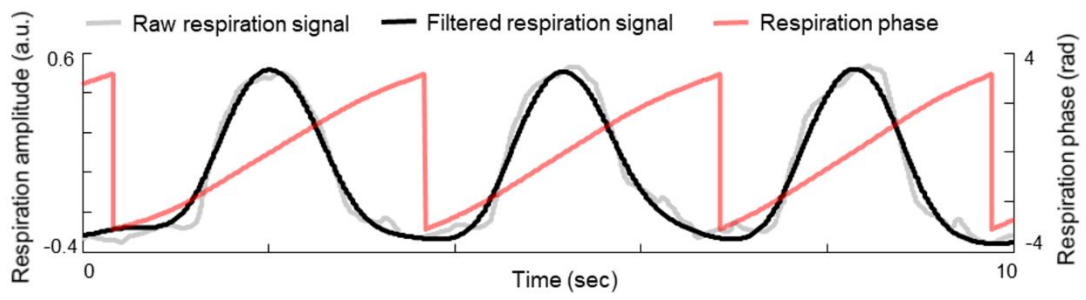

**Supplementary Figure 1.** Computation of respiration phase. Raw respiration signals were bandpass filtered between 0.2 and 0.8 Hz. Then the respiration phase was obtained using the Hilbert transform.

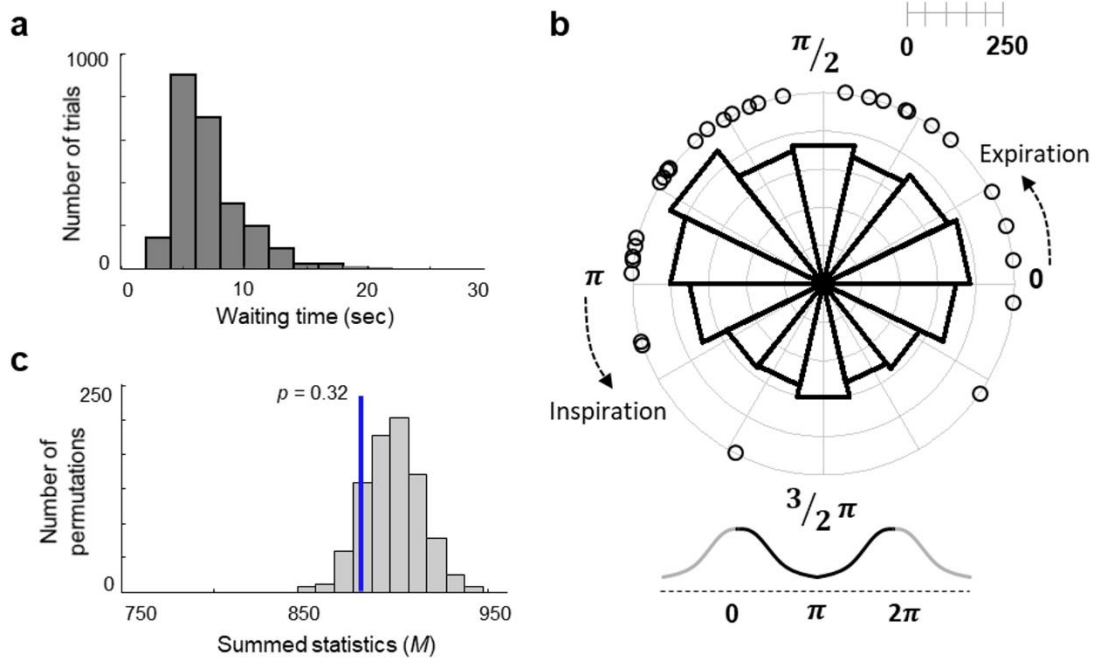

**Supplementary Figure 2.** The respiratory phase and the onset of externally-triggered button presses in Experiment-3. (a) Distribution of intervals from beginning of trial to the externally-triggered button presses (pooled across 32 participants). (b) Distribution of respiration phases with respect to the timing of externally-triggered button presses. The small black circle represents each participant's mean respiration phase at the button press. The polar histogram shows the distribution of all the externally-triggered button presses from 32 participants. (c) Histogram of the summed statistics (i.e., minimum number of data points that can be observed in half of the circle; Hodges-Ajne test) obtained from surrogate respiration data. The blue vertical line indicates the summed statistics from original respiration data. A computed test statistics using original data was not different from chance level statistics obtained from phase shifted surrogate respiration data (permutation  $p = 0.32$ ), confirming the timing of button press in Experiment-3 is not coupled with respiration phase.

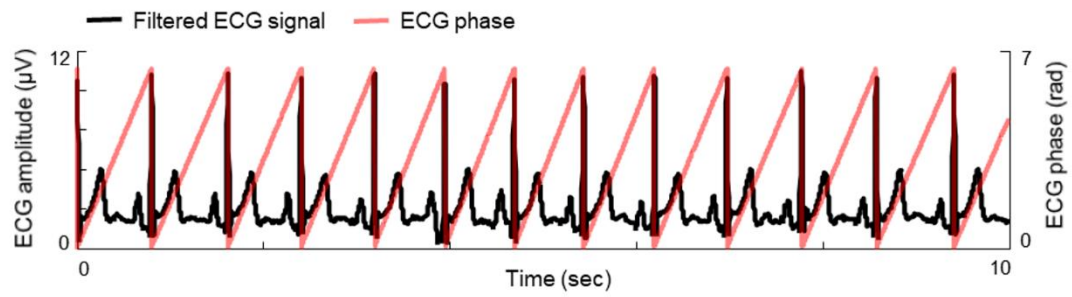

**Supplementary Figure 3.** Computation of cardiac phase. Heartbeat phase was computed using a method based on a peak detection algorithm.

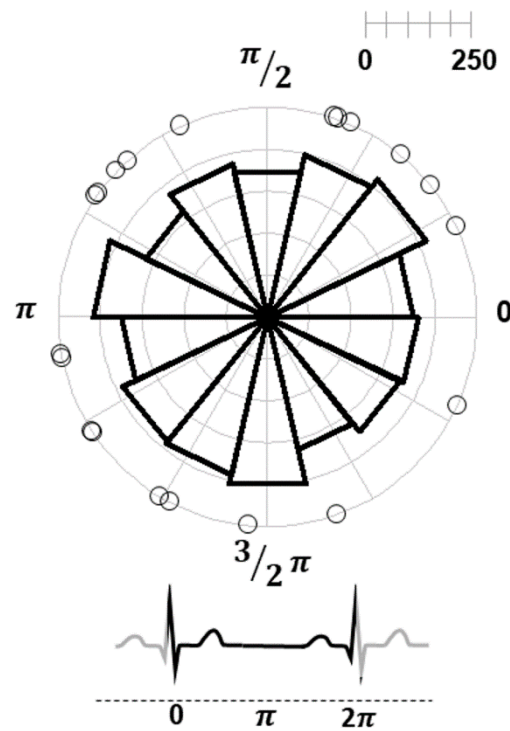

**Supplementary Figure 4.** Distribution of heartbeat phases at the timing of the voluntary action in Experiment-1. The small black circle represents each participant's mean heartbeat phase at the button press. No preferential phase emerged (Hodges-Ajne test,  $p = 0.59$ ,  $M = 6$ ). Polar histogram shows the distribution of all the button presses from 20 participants, which was uniformly distributed ( $p = 0.80$ ,  $M = 1262$ ).

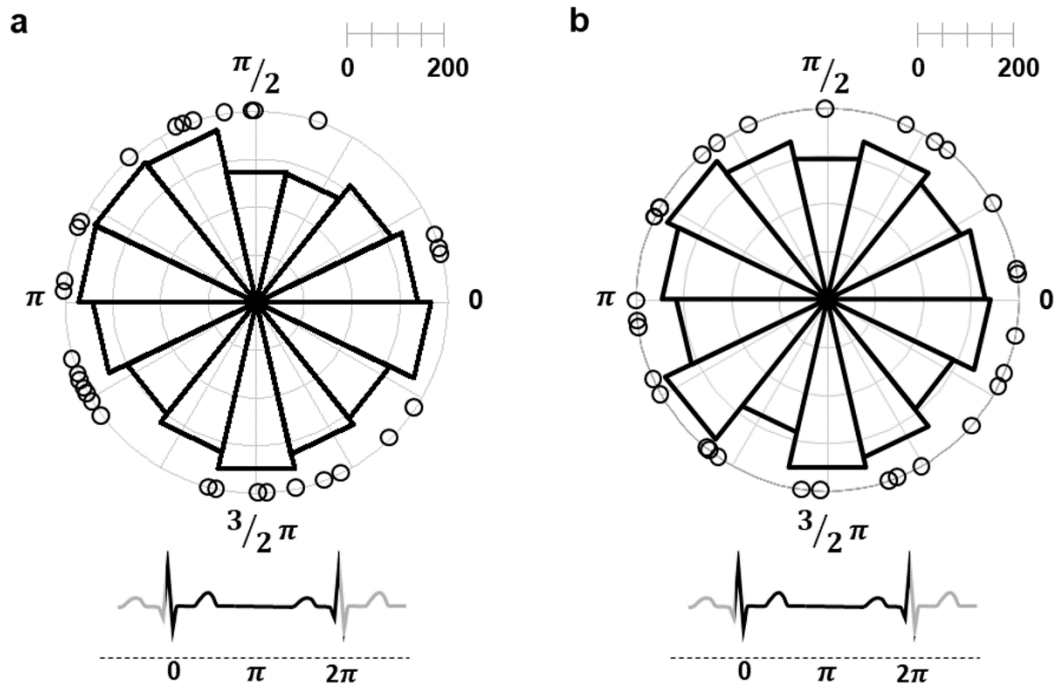

**Supplementary Figure 5.** Distribution of heartbeat phases at the timing of the button presses in Experiment-2 and 3. The small black circle represents each participant's mean heartbeat phase at the button press. No preferential phase emerged neither in the Libet task (a: Hodges-Ajne test,  $p = 0.71$ ,  $M = 11$ ) nor in the externally-triggered task (b:  $p = 0.92$ ,  $M = 12$ ). Polar histogram shows the distribution of all the button presses from 31 participants, which was uniformly distributed (a:  $p = 0.24$ ,  $M = 1106$ ; b:  $p = 0.78$ ,  $M = 1125$ ).
